# Supplementary material for: Nasal Cytokine Profiles of Patients Hospitalised with Respiratory Wheeze Associated with Rhinovirus C
Source: PubMed Central journal article supplement (PMC6893661; doi:10.3390/v11111038), 2019-11-07
Supplement: viruses-11-01038-s001.pdf [file viruses-11-01038-s001.pdf]

1 **Appendix A**

2 **Supplementary**

3 **Table S1.** Nasal cytokine levels of healthy non-respiratory disease controls, RV-C infected patients with asthma and without asthma.

| <b>Participants</b> | <b>IL-5</b> | <b>IL-9</b> | <b>IL-15</b> | <b>IL-18</b> | <b>IL-21</b> | <b>IL-22</b> | <b>IL-23</b> | <b>IL-27</b> | <b>IL-31</b> | <b>TNF-<math>\alpha</math></b> | <b>CXCL-12</b> | <b>CXCL-1</b> | <b>MIP-1<math>\beta</math></b> | <b>RANTES</b> | <b>GM-CSF</b> | <b>Eotaxin</b> |
|---------------------|-------------|-------------|--------------|--------------|--------------|--------------|--------------|--------------|--------------|--------------------------------|----------------|---------------|--------------------------------|---------------|---------------|----------------|
| Ctrls (n=5)         | 17          | 0           | 0            | 66           | 89           | 48           | 32           | 0            | 59           | 8                              | 390            | 426           | 19                             | 8             | 5             | 10             |
| IQR                 | 13-16       | 0-36        | 0-2          | 62-78        | 88-97        | 45-53        | 13-34        | 0-91         | 56-67        | 6-9                            | 358-458        | 344-676       | 17-26                          | 7-9           | 5-7           | 9-17           |
| Asth (n=18)         | 12          | 51          | 10           | 38           | 114          | 157          | 38           | 103          | 77           | 8                              | 331            | 193           | 45                             | 9             | 7             | 8              |
| IQR                 | 7-23        | 20-95       | 6-19         | 12-76        | 32-191       | 45-389       | 16-99        | 25-241       | 31-147       | 5-15                           | 124-453        | 93-315        | 17-67                          | 3-21          | 2-15          | 5-14           |
| Non-Asth (n=15)     | 14          | 36          | 7            | 22           | 50           | 91           | 16           | 47           | 38           | 5                              | 142            | 103           | 25                             | 4             | 5             | 6              |
| IQR                 | 10-16       | 18-87       | 4-10         | 13-26        | 29-81        | 35-174       | 15-35        | 11-107       | 23-55        | 5-11                           | 79-228         | 62-240        | 10-87                          | 3-5           | 2-8           | 5-9            |
| <i>p values</i>     |             |             |              |              |              |              |              |              |              |                                |                |               |                                |               |               |                |
| Asth vs Ctrls       | n.s         | 0.009       | <0.001       | n.s          | n.s          | 0.048        | n.s          | 0.005        | n.s          | n.s                            | n.s            | 0.002         | n.s                            | n.s           | n.s           | n.s            |
| Non-asth vs Ctrls   | n.s         | 0.024       | <0.001       | 0.004        | 0.025        | n.s          | n.s          | 0.047        | 0.025        | n.s                            | 0.005          | 0.001         | n.s                            | 0.007         | n.s           | 0.004          |
| Asth vs Non-asth    | n.s         | n.s         | 0.049        | n.s          | n.s          | n.s          | 0.01         | 0.031        | n.s          | n.s                            | n.s            | n.s           | n.s                            | n.s           | n.s           | n.s            |

4 Abbreviations: IL-interleukin, TNF- $\alpha$ - Tumour necrosis factor alpha, CXCL- chemokine ligand, MIP- Macrophage Inflammatory protein, RANTES- Regulated on  
 5 Activation, Normal T Cell Expressed and Secreted, GM-CSF-Granulocyte-macrophage colony-stimulating factor. Asth-asthmatics, Non.Asth-Non-asthmatics,  
 6 Ctrls-controls, IQR- interquartile range.

**Table S2.** The relationship between RV-C load and inflammatory mediator production in the nasal secretions of children with asthma.

|                               | IFN- $\alpha$ | IL-1 $\beta$ | IL-4  | IL-6  | IL-10 | IL-17 | IL-9  | IL-15 | CXCL-1 | IL-8 | IP-10 | IL-2  | IL-27 |
|-------------------------------|---------------|--------------|-------|-------|-------|-------|-------|-------|--------|------|-------|-------|-------|
| Correlation (R <sup>2</sup> ) | 0.05          | -0.03        | -0.10 | -0.07 | 0.11  | -0.06 | -0.02 | -0.08 | -0.05  | 0.00 | 0.02  | -0.18 | -0.19 |
| p-value                       | 0.85          | 0.92         | 0.71  | 0.79  | 0.69  | 0.83  | 0.93  | 0.77  | 0.85   | 1.00 | 0.95  | 0.52  | 0.47  |

**Table S3.** The relationship between RV-C load and inflammatory mediator production in the nasal secretions of children without asthma.

|                               | IFN- $\alpha$ | IL-4 | IL-6  | IL-8  | IL-9  | IL-15 | IP-10 | IL-18 | IL-21 | IL-27 | IL-31 | Eotaxin | CXCL-1 | CXCL-12 | RANTES |
|-------------------------------|---------------|------|-------|-------|-------|-------|-------|-------|-------|-------|-------|---------|--------|---------|--------|
| Correlation (R <sup>2</sup> ) | -0.16         | 0.14 | -0.27 | -0.01 | -0.03 | -0.29 | -0.18 | -0.31 | -0.20 | 0.02  | -0.19 | -0.15   | -0.06  | -0.10   | -0.42  |
| p-value                       | 0.59          | 0.64 | 0.35  | 0.97  | 0.92  | 0.32  | 0.53  | 0.28  | 0.50  | 0.95  | 0.51  | 0.62    | 0.83   | 0.74    | 0.13   |

**Table S4.** Association between cytokine production and hospitalisation of children hospitalised following RV-C infection using the Mann-Whitney U test.

| Cytokine      | p-value (Asthmatics) | p-value (Non-Asthmatics) |
|---------------|----------------------|--------------------------|
| IFN- $\gamma$ | 0.26                 | 0.947                    |
| IL-4          | 0.259                | 0.601                    |
| IL-6          | 0.212                | 1.00                     |
| IL-8          | 0.26                 | 0.361                    |
| IL-9          | 0.109                | 0.744                    |
| IP-10         | 0.594                | 0.896                    |
| IL-15         | 0.191                | 0.512                    |
| IL-27         | 0.138                | 0.554                    |
| CXCL-1        | 0.515                | 0.794                    |
| IL-13         | 0.313                | -                        |
| IL-1B         | 0.441                | -                        |
| IL-17         | 0.233                | -                        |
| IL-22         | 0.26                 | -                        |
| IL-18         | -                    | 0.794                    |
| IL-21         | -                    | 1.00                     |
| Eotaxin       | -                    | 0.946                    |
| CXCL-12       | -                    | 0.896                    |
| RANTES        | -                    | 0.647                    |
| IL-31         | -                    | 0.793                    |

- denotes that analysis was not performed in that group.
